# Supplementary material
Source: PubMed Central journal article supplement (PMC3742714)
Supplement: NIHMS464704-supplement-supplement_1.pdf [file NIHMS464704-supplement-supplement_1.pdf]

744 **Supplementary tables**

745 **Table 1 Distribution of occupational class among women aged 25 – 49 years by region across 33 low and middle income countries**  
 746 **participating in Demographic Health Survey (1992 to 2009).**

| Occupational class                   | North Africa/West & Central Asia <sup>1</sup> |             |             | South & Southeast Asia <sup>2</sup> |              |              | Sub-Saharan Africa <sup>3</sup> |              |              | Latin America & Caribbean <sup>4</sup> |              |              |
|--------------------------------------|-----------------------------------------------|-------------|-------------|-------------------------------------|--------------|--------------|---------------------------------|--------------|--------------|----------------------------------------|--------------|--------------|
|                                      | 1992- 1997                                    | 1998- 2003  | 2004- 2009  | 1992- 1997                          | 1998- 2003   | 2004- 2009   | 1992- 1997                      | 1998- 2003   | 2004- 2009   | 1992- 1997                             | 1998- 2003   | 2004- 2009   |
|                                      | %                                             | %           | %           | %                                   | %            | %            | %                               | %            | %            | %                                      | %            | %            |
| <b>Participants</b>                  | <b>9694</b>                                   | <b>7332</b> | <b>8752</b> | <b>3721</b>                         | <b>18938</b> | <b>25873</b> | <b>19013</b>                    | <b>47936</b> | <b>48676</b> | <b>17680</b>                           | <b>23243</b> | <b>18067</b> |
| Professional, technical & managerial | 9.1                                           | 9.2         | 9.5         | 1.1                                 | 2.6          | 3.3          | 1.8                             | 2.0          | 3.5          | 6.4                                    | 7.2          | 8.0          |
| Clerical                             | 3.6                                           | 3.5         | 1.9         | 0.1                                 | 0.6          | 0.8          | 0.9                             | 0.7          | 0.8          | 2.5                                    | 2.2          | 4.8          |
| Sales                                | 1.4                                           | 1.1         | 1.1         | 1.1                                 | 2.6          | 3.6          | 22.8                            | 20.3         | 21.1         | 13.5                                   | 14.0         | 21.8         |
| Services                             | 2.0                                           | 0.9         | 1.5         | 0.1                                 | 1.2          | 3.9          | 2.6                             | 2.4          | 2.7          | 5.6                                    | 6.3          | 20.8         |
| Production                           | 2.1                                           | 2.3         | 1.3         | 10.1                                | 5.4          | 7.1          | 6.3                             | 6.3          | 8.4          | 10.7                                   | 13.4         | 5.4          |
| Agriculture                          | 6.1                                           | 5.4         | 4.3         | 52.0                                | 32.6         | 27.3         | 34.2                            | 47.5         | 37.8         | 12.0                                   | 16.4         | 18.9         |
| Not working                          | 75.7                                          | 77.6        | 80.3        | 35.7                                | 55.0         | 53.8         | 31.4                            | 20.8         | 25.6         | 49.3                                   | 40.4         | 20.4         |

747

748 <sup>1</sup> **North Africa/West & Central Asia countries included** (Egypt, Jordan, Kazakhstan, Turkey)

749 <sup>2</sup> **South & Southeast Asia countries included** (Bangladesh, Cambodia, India, Nepal)

750 <sup>3</sup> **Sub-Saharan Africa countries included** (Benin, Burkina Faso, Cameroon, Chad, Cote D'Ivoire, Ethiopia, Ghana, Guinea, Kenya,  
 751 Madagascar, Malawi, Mali, Mozambique, Namibia, Niger, Nigeria, Rwanda, Tanzania, Uganda)

752 <sup>4</sup> **Latin America & Caribbean countries included** (Bolivia, Colombia, Guatemala, Haiti, Nicaragua, Peru)

753

754 **Table 2 Sample size, mean BMI, and percentage overweight among women aged 25 – 49**  
755 **years across 33 low and middle income countries participating in Demographic Health**  
756 **Survey (1992 to 2009).**

| Country                                      | Year of Interview | No. of subjects | BMI Mean    | Overweight $\geq 25.0$ kg/m <sup>2</sup> |
|----------------------------------------------|-------------------|-----------------|-------------|------------------------------------------|
| <b>North Africa /West &amp; Central Asia</b> |                   | <b>25,778</b>   | <b>27.6</b> | <b>65.5</b>                              |
| Egypt                                        | 1995              | 5163            | 26.4        | 53.4                                     |
| Egypt                                        | 2000              | 5373            | 28.4        | 73.2                                     |
| Egypt                                        | 2005              | 6408            | 28.7        | 75.7                                     |
| Jordan                                       | 1997              | 2509            | 27.8        | 65.9                                     |
| Jordan                                       | 2007              | 2344            | 27.8        | 68.2                                     |
| Kazakhstan                                   | 1995              | 414             | 23.4        | 28.0                                     |
| Kazakhstan                                   | 1999              | 357             | 23.2        | 24.9                                     |
| Turkey                                       | 1993              | 1608            | 26.7        | 58.5                                     |
| Turkey                                       | 1998              | 1602            | 26.8        | 59.7                                     |
| <b>South &amp; Southeast Asia</b>            |                   | <b>48,532</b>   | <b>20.7</b> | <b>10.2</b>                              |
| Bangladesh                                   | 1996              | 1804            | 19.5        | 4.6                                      |
| Bangladesh                                   | 1999              | 2231            | 20.0        | 7.8                                      |
| Bangladesh                                   | 2004              | 2323            | 20.5        | 10.0                                     |
| Cambodia                                     | 2000              | 2083            | 20.7        | 6.5                                      |
| Cambodia                                     | 2005              | 1983            | 21.1        | 9.8                                      |
| India                                        | 1999              | 12,020          | 20.4        | 8.2                                      |
| India                                        | 2005              | 19,398          | 21.2        | 14.6                                     |
| Nepal                                        | 1996              | 1917            | 20.2        | 2.2                                      |
| Nepal                                        | 2001              | 2604            | 20.4        | 4.6                                      |
| Nepal                                        | 2006              | 2169            | 20.6        | 6.8                                      |
| <b>Sub-Saharan Africa</b>                    |                   | <b>115,625</b>  | <b>22.1</b> | <b>16.3</b>                              |
| Benin                                        | 1996              | 1529            | 21.4        | 10.9                                     |
| Benin                                        | 2001              | 2183            | 22.4        | 18.5                                     |
| Benin                                        | 2006              | 6481            | 22.5        | 18.1                                     |
| Burkina Faso                                 | 1992              | 1445            | 21.6        | 12.5                                     |
| Burkina Faso                                 | 1998              | 2333            | 21.1        | 8.1                                      |
| Burkina Faso                                 | 2003              | 4479            | 20.8        | 7.9                                      |
| Cameroon                                     | 1998              | 965             | 23.3        | 27.4                                     |
| Cameroon                                     | 2004              | 1393            | 23.9        | 31.1                                     |
| Chad                                         | 1996              | 2351            | 20.8        | 8.3                                      |
| Chad                                         | 2004              | 1830            | 21.3        | 12.6                                     |
| Cote D Ivoire                                | 1994              | 1897            | 22.4        | 18.0                                     |
| Cote D Ivoire                                | 1998              | 788             | 23.4        | 26.0                                     |
| Ethiopia                                     | 2000              | 4512            | 20.0        | 4.2                                      |
| Ethiopia                                     | 2005              | 2049            | 20.3        | 5.2                                      |
| Ghana                                        | 1998              | 1524            | 22.0        | 15.7                                     |
| Ghana                                        | 2003              | 1777            | 22.8        | 23.1                                     |
| Ghana                                        | 2008              | 1415            | 23.6        | 30.8                                     |
| Guinea                                       | 1999              | 2251            | 21.9        | 14.0                                     |
| Guinea                                       | 2005              | 1429            | 21.8        | 13.6                                     |
| Kenya                                        | 1998              | 1608            | 22.1        | 15.9                                     |
| Kenya                                        | 2003              | 2200            | 22.8        | 24.2                                     |
| Kenya                                        | 2008              | 2366            | 22.9        | 26.8                                     |
| Madagascar                                   | 1997              | 1528            | 20.7        | 6.0                                      |
| Madagascar                                   | 2003              | 2130            | 21.2        | 10.3                                     |
| Madagascar                                   | 2008              | 2366            | 20.6        | 7.1                                      |

| Country                              | Year of Interview | No. of subjects | BMI Mean    | Overweight $\geq 25.0$ kg/m <sup>2</sup> |
|--------------------------------------|-------------------|-----------------|-------------|------------------------------------------|
| Malawi                               | 2000              | 4053            | 22.2        | 13.7                                     |
| Malawi                               | 2004              | 3631            | 22.2        | 14.1                                     |
| Mali                                 | 1995              | 2799            | 21.4        | 11.2                                     |
| Mali                                 | 2001              | 4372            | 22.3        | 16.9                                     |
| Mali                                 | 2006              | 4892            | 22.6        | 21.0                                     |
| Mozambique                           | 1997              | 1822            | 22.0        | 12.8                                     |
| Mozambique                           | 2003              | 3581            | 22.3        | 15.8                                     |
| Namibia                              | 1992              | 1451            | 22.8        | 23.8                                     |
| Namibia                              | 2006              | 2279            | 23.9        | 34.4                                     |
| Niger                                | 1998              | 2153            | 21.3        | 13.1                                     |
| Niger                                | 2006              | 1702            | 22.5        | 22.6                                     |
| Nigeria                              | 2003              | 2177            | 22.8        | 23.8                                     |
| Nigeria                              | 2008              | 10,735          | 22.7        | 23.1                                     |
| Rwanda                               | 2000              | 2750            | 22.2        | 13.6                                     |
| Rwanda                               | 2005              | 1801            | 22.1        | 12.3                                     |
| Tanzania                             | 1996              | 2350            | 22.0        | 14.0                                     |
| Tanzania                             | 2004              | 3324            | 22.4        | 17.9                                     |
| Uganda                               | 1995              | 1841            | 22.0        | 13.4                                     |
| Uganda                               | 2000              | 2100            | 22.1        | 15.4                                     |
| Uganda                               | 2006              | 983             | 21.8        | 13.9                                     |
| <b>Latin America &amp; Caribbean</b> |                   | <b>58,990</b>   | <b>25.3</b> | <b>46.8</b>                              |
| Bolivia                              | 1998              | 3046            | 25.5        | 48.3                                     |
| Bolivia                              | 2003              | 4528            | 26.2        | 53.6                                     |
| Bolivia                              | 2008              | 4030            | 26.4        | 57.3                                     |
| Colombia                             | 1995              | 2226            | 25.0        | 46.1                                     |
| Colombia                             | 2000              | 2096            | 25.4        | 49.7                                     |
| Colombia                             | 2005              | 6571            | 25.3        | 47.1                                     |
| Guatemala                            | 1995              | 3302            | 24.4        | 36.0                                     |
| Guatemala                            | 1998              | 1555            | 25.2        | 44.9                                     |
| Haiti                                | 1994              | 1385            | 21.4        | 13.4                                     |
| Haiti                                | 2000              | 2728            | 22.8        | 24.6                                     |
| Haiti                                | 2005              | 1308            | 22.8        | 23.9                                     |
| Nicaragua                            | 1997              | 3119            | 25.2        | 45.4                                     |
| Nicaragua                            | 2001              | 2672            | 25.9        | 52.1                                     |
| Peru                                 | 1996              | 7648            | 25.3        | 46.9                                     |
| Peru                                 | 2000              | 6618            | 25.7        | 50.4                                     |
| Peru                                 | 2004              | 6158            | 26.2        | 56.4                                     |

757
